# Supplementary material for: A chromosome-level genome assembly for Onobrychis viciifolia reveals gene copy number gain underlying enhanced proanthocyanidin biosynthesis
Source: Springer Nature journal article supplement (doi:10.1038/s42003-023-05754-6), 2024-01-05
Supplement: 42003_2023_5754_MOESM1_ESM.pdf [file 42003_2023_5754_MOESM1_ESM.pdf]

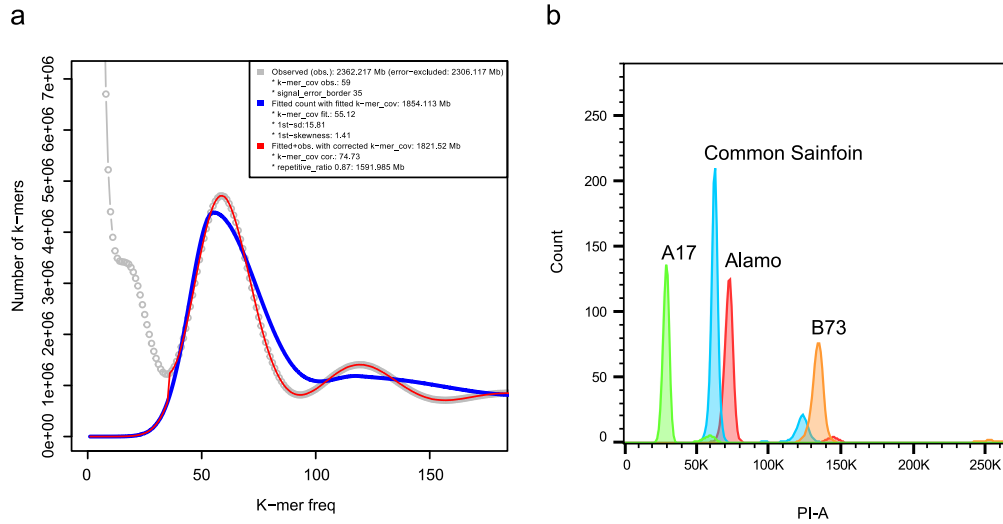

Supplementary Fig. 1 Genome size estimation of *O. vicifolia*. (a) K-mer (k=17) distribution for estimating genome size of *O. vicifolia*. (b) Flow cytometry for estimating genome size of *O. vicifolia*, with *Zea mays* B73, *Medicago truncatula* A17, and *Panicum virgatum* Alamo as internal reference plants.

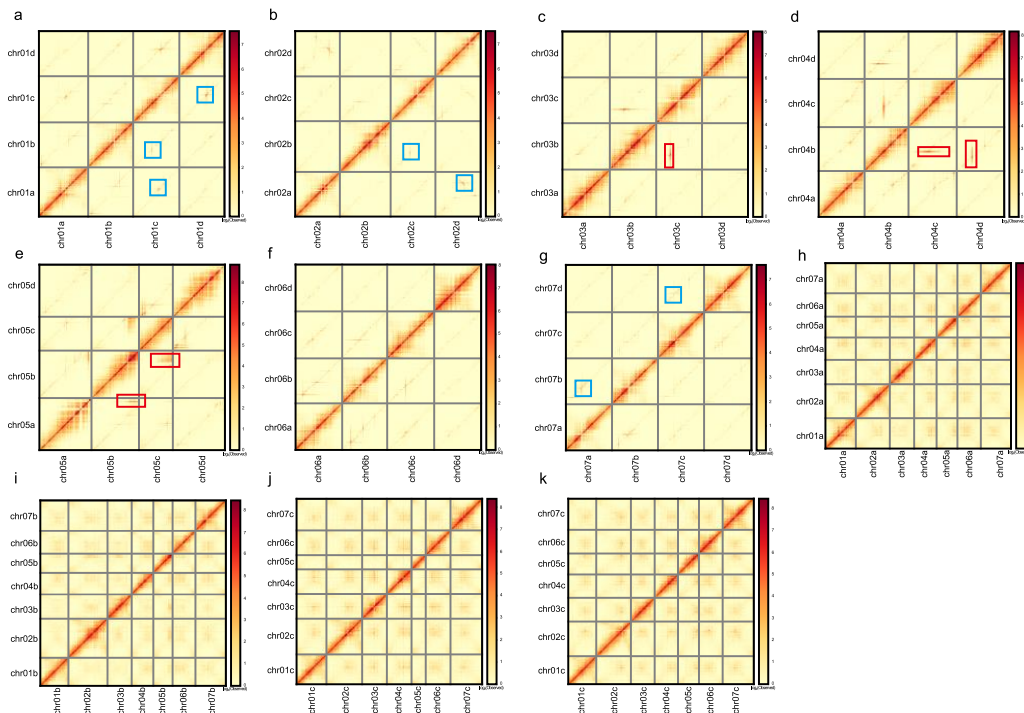

Supplementary Fig. 2 Hi-C interaction heatmap of homologous chromosomes (a-g) and haplotypes (h-k) of *O. vicifolia*. The red blocks represent the areas of collapse and the blue blocks represent the areas of switch error which can be clearly observed.

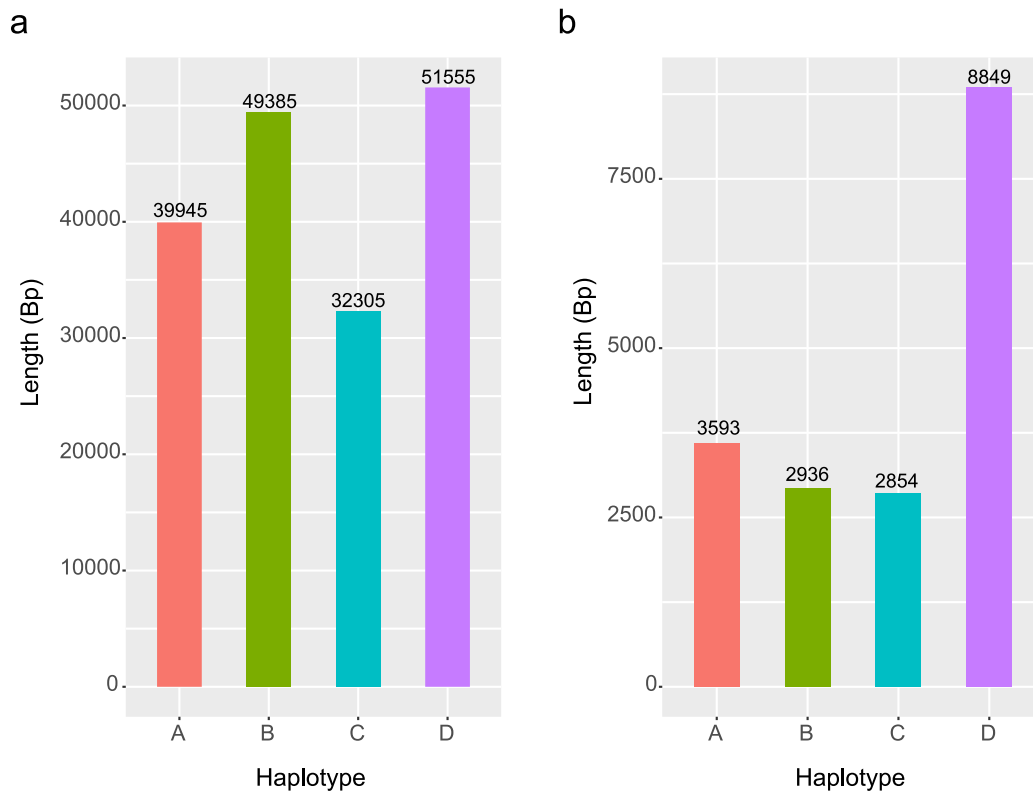

Supplementary Fig. 3 The statistics of (a) collapse and (b) switch error length in the assembled genome of *O. viciifolia*.

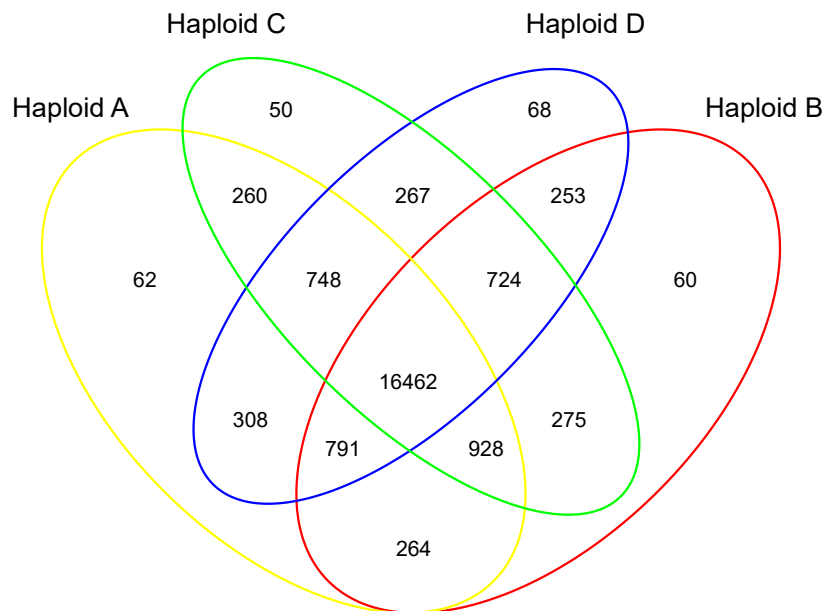

Supplementary Fig. 4 Venn plot of gene families of four haploids

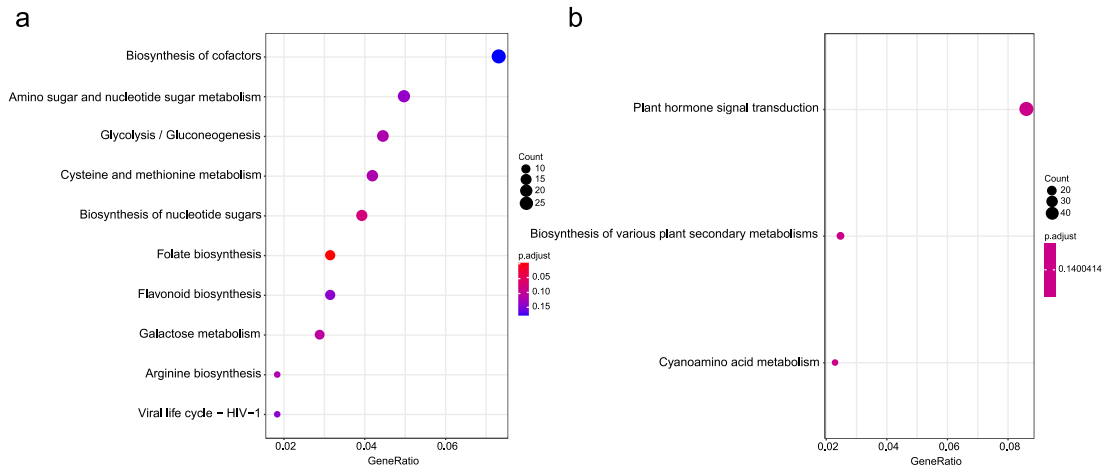

Supplementary Fig. 5 (a) KEGG enrichment of expanded gene families in *O. viciifolia*. (b) KEGG enrichment of contracted gene families in *O. viciifolia*.

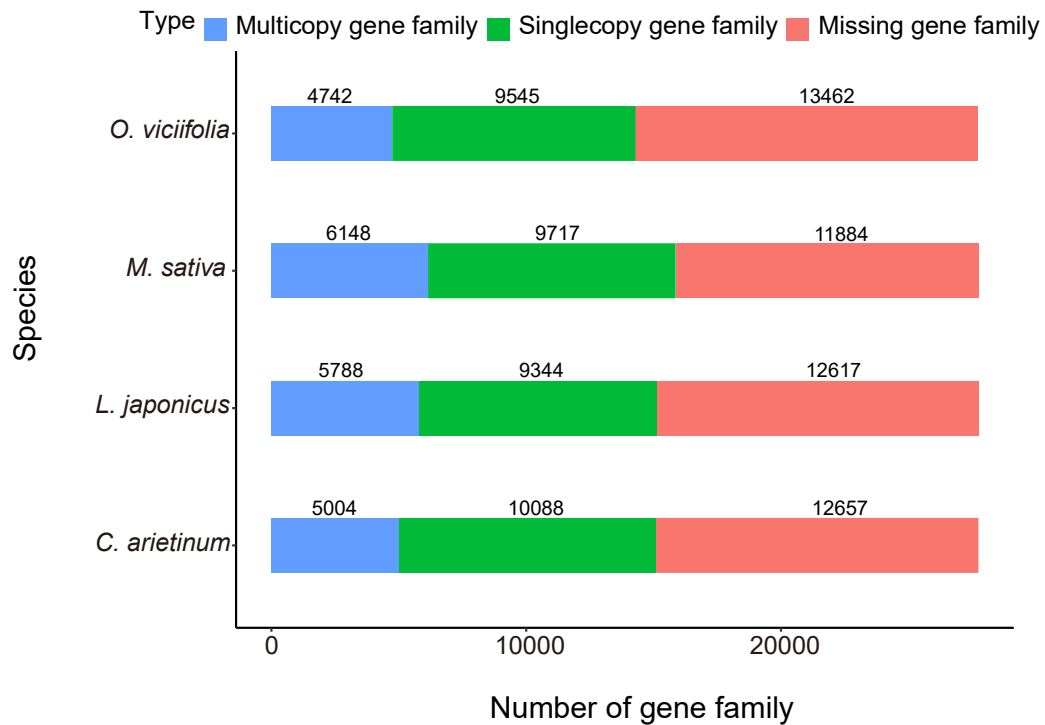

Supplementary Fig. 6 Gene families among different species. Single-copy (with only one gene in one gene family), multiple-copy, and missing gene families were shown for *C. arietinum*, *M. sativa*, *O. viciifolia*, and *L. japonicus*. The non-redundant gene families were achieved by combining the ones in the 15 Fabales species in the phylogenetic tree, and missing gene families were determined if not found in a given species.

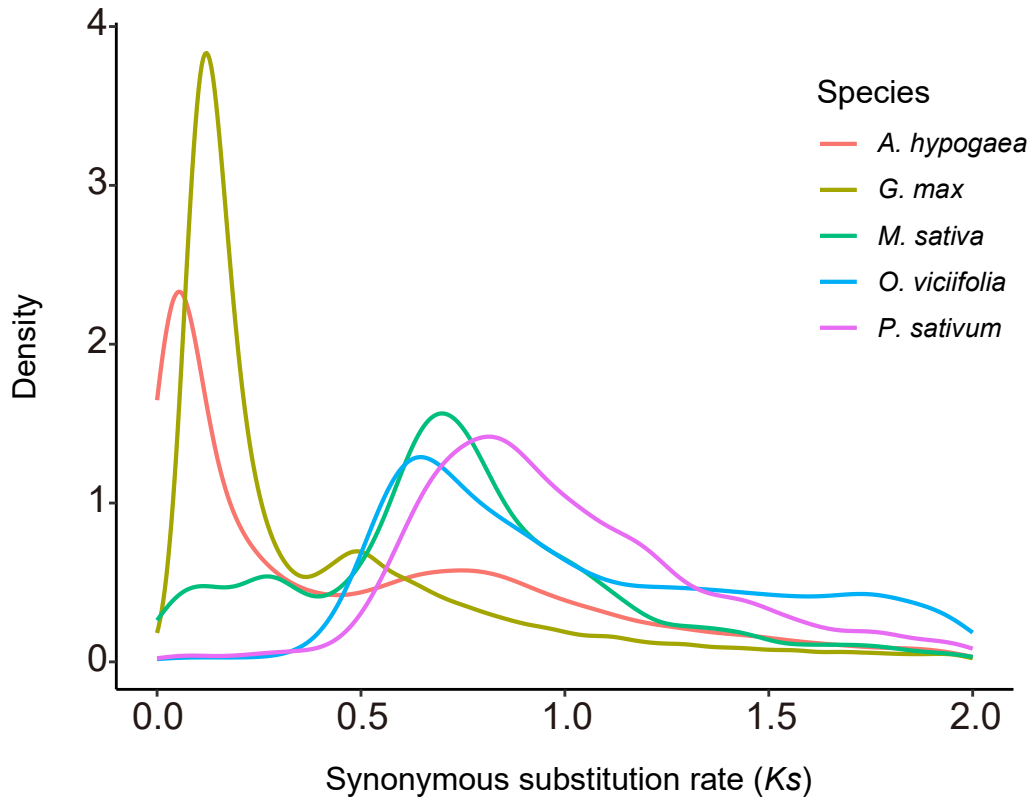

Supplementary Fig. 7 Distribution of synonymous substitution rate ( $K_s$ ) of homologous gene pairs in *O. viciifolia* compared to other species.



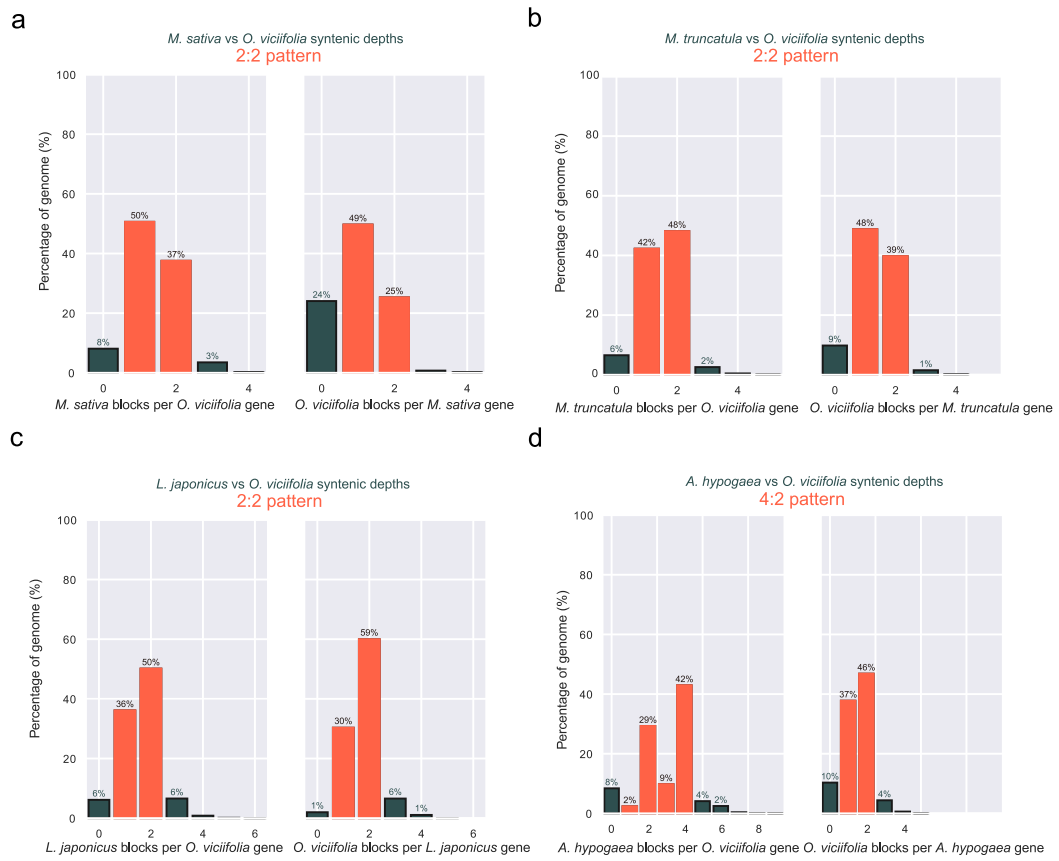

Supplementary Fig. 8 The synteny depths between *O. viciifolia* and selected species. (a) *M. sativa* vs *O. viciifolia*, (b) *M. truncatula* vs *O. viciifolia*, (c) *L. japonicus* vs *O. viciifolia*, (d) *A. hypogaea* vs *O. viciifolia*.

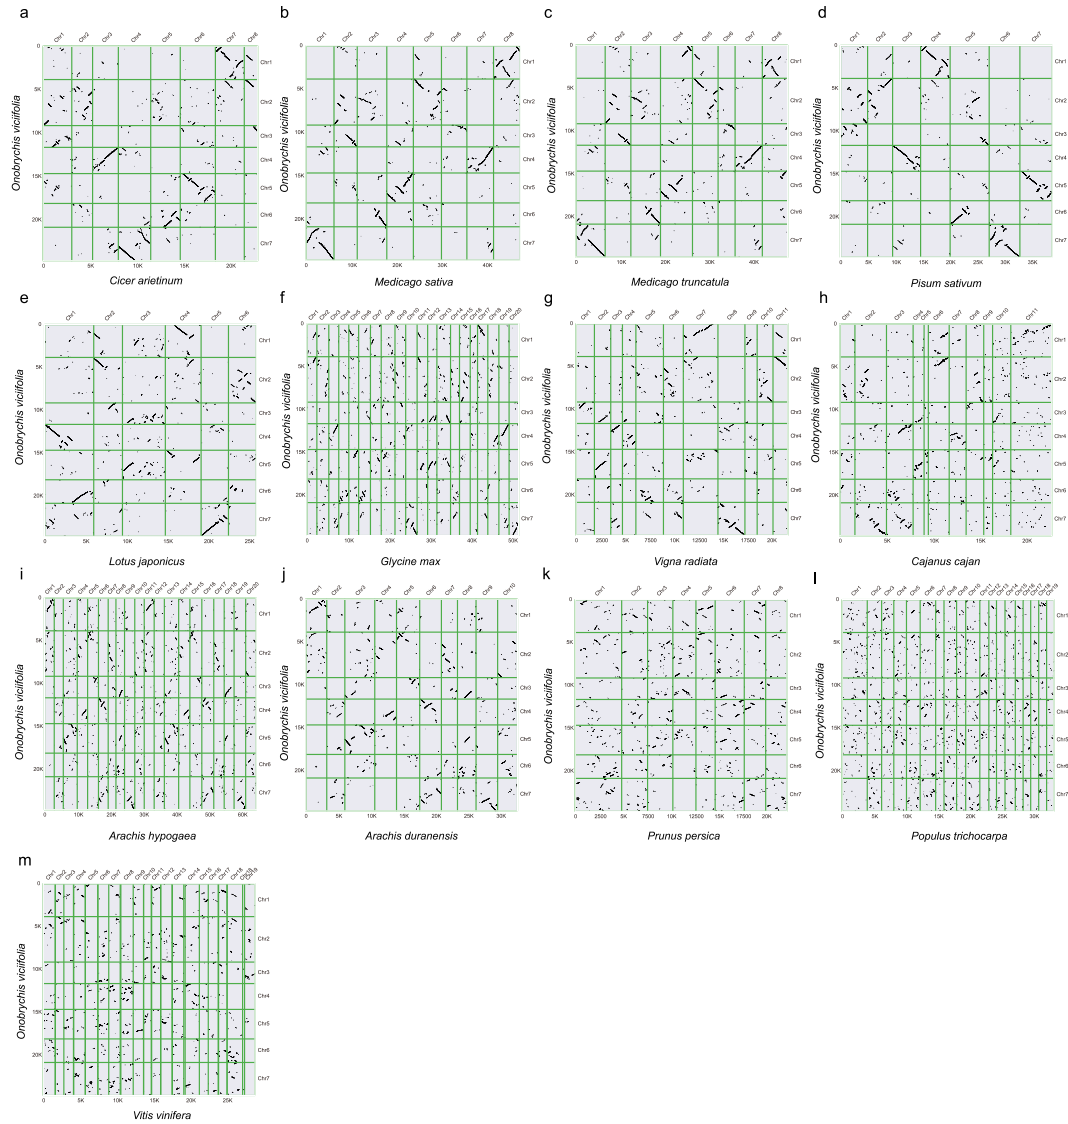

Supplementary Fig. 9 Collinearity of genomes between *O. viciifolia* and selected species. (a) *O. viciifolia* vs *C. arietinum*, (b) *O. viciifolia* vs *M. sativa*, (c) *O. viciifolia* vs *M. truncatula*, (d) *O. viciifolia* vs *P. sativum*, (e) *O. viciifolia* vs *L. japonicus*, (f) *O. viciifolia* vs *G. max*, (g) *O. viciifolia* vs *V. radiata*, (h) *O. viciifolia* vs *C. cajan*, (i) *O. viciifolia* vs *A. hypogaea*, (j) *O. viciifolia* vs *A. duranensis*, (k) *O. viciifolia* vs *P. persica*, (l) *O. viciifolia* vs *P. trichocarpa*, (m) *O. viciifolia* vs *V. vinifera*.

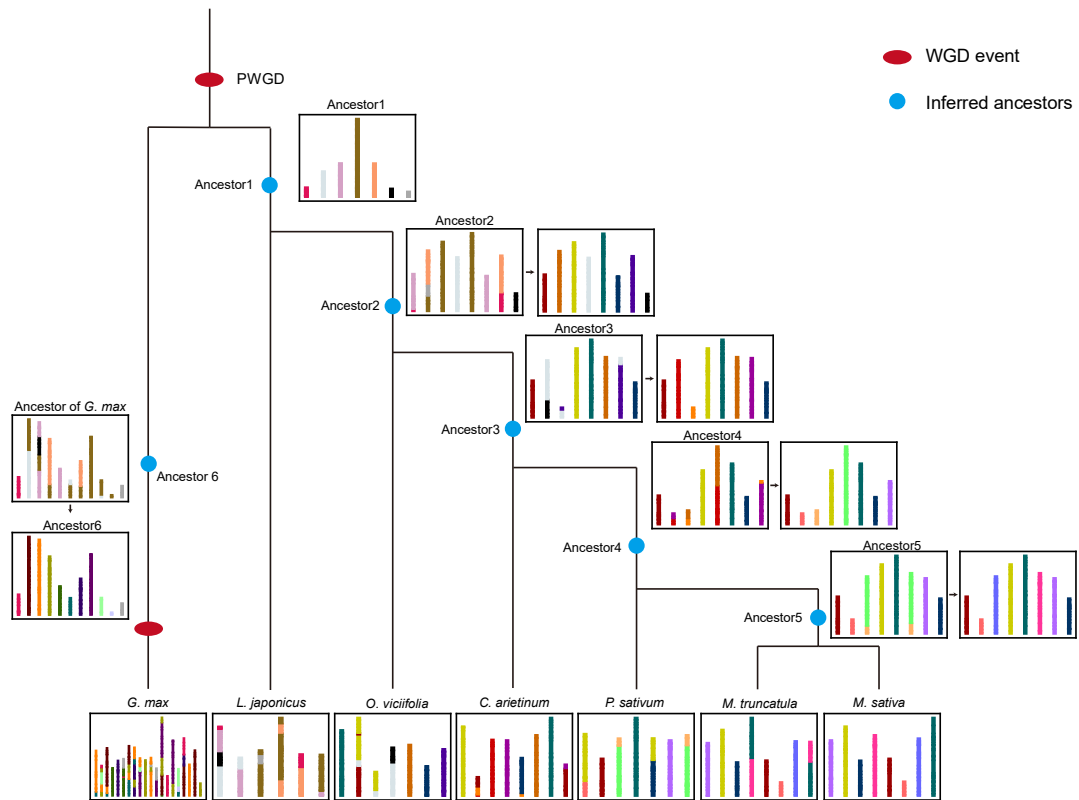

Supplementary Fig. 10 Ancestral karyotype within the selected modern leguminous species. The blue points represented the referred ancestors.

a

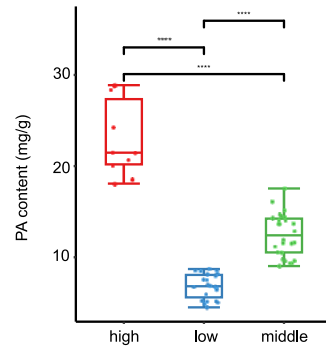

b (H-L)

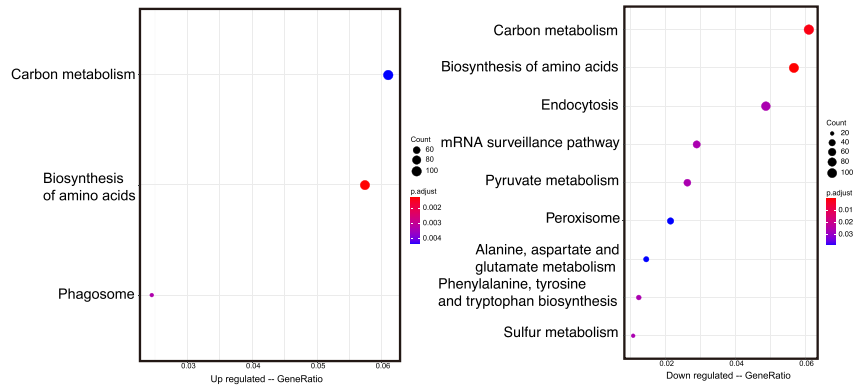

c (H-M)

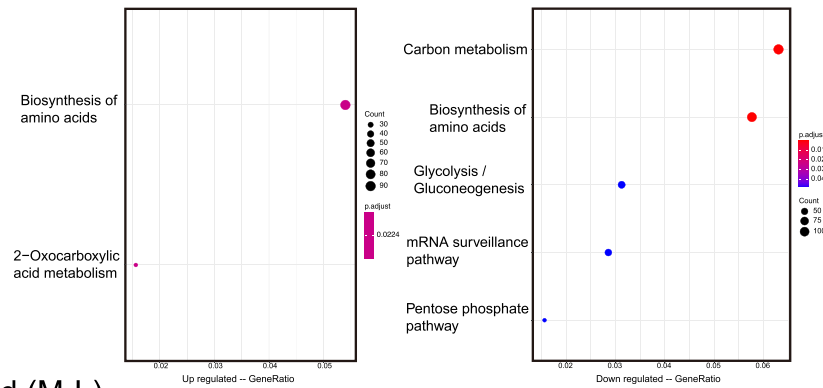

d (M-L)

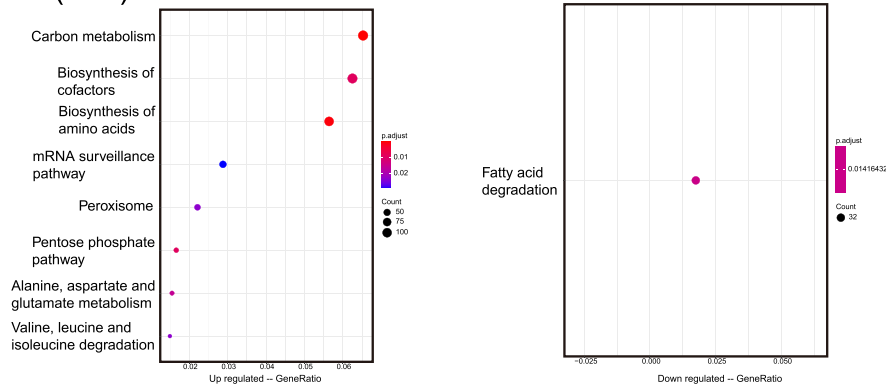

Supplementary Fig. 11 Three groups with different PA contents and KEGG enrichment of DEGs in *O. viciifolia*. (a) The 9 samples were clustered into three groups, based on their high (H), medium (M), and low (L) levels of PA content. Asterisks represent the significance level based on the t test (\*\*\*\* for  $P < 0.0001$ ). (b-d) KEGG enrichment of up- and down-regulated DEGs for the

comparisons of H vs L, H vs M, M vs L.

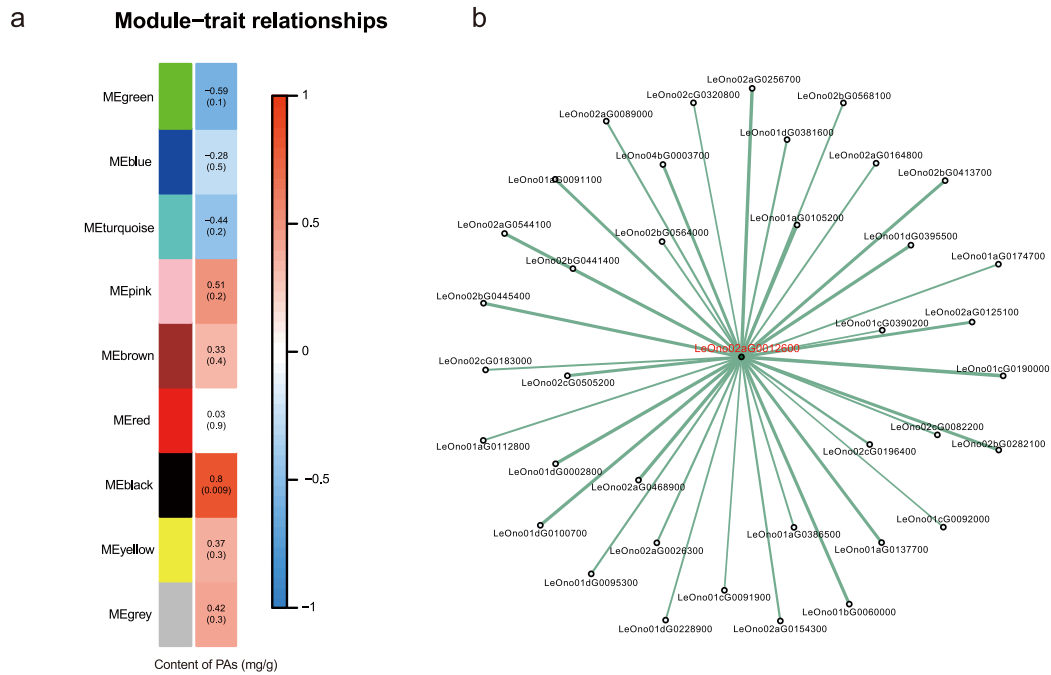

Supplementary Fig. 12 Correlation of gene expression in the three groups with different PA contents by RNA-seq. (a) Correlation between 9 gene modules and 15 phenotypic traits, including PA content. Each cell contains the correlation coefficient and the p-value (in-brackets) between gene modules and the traits. (b) The significant links between the core gene of ANS (LeOno02aG0012600) and the other genes in the gene module MEblack.

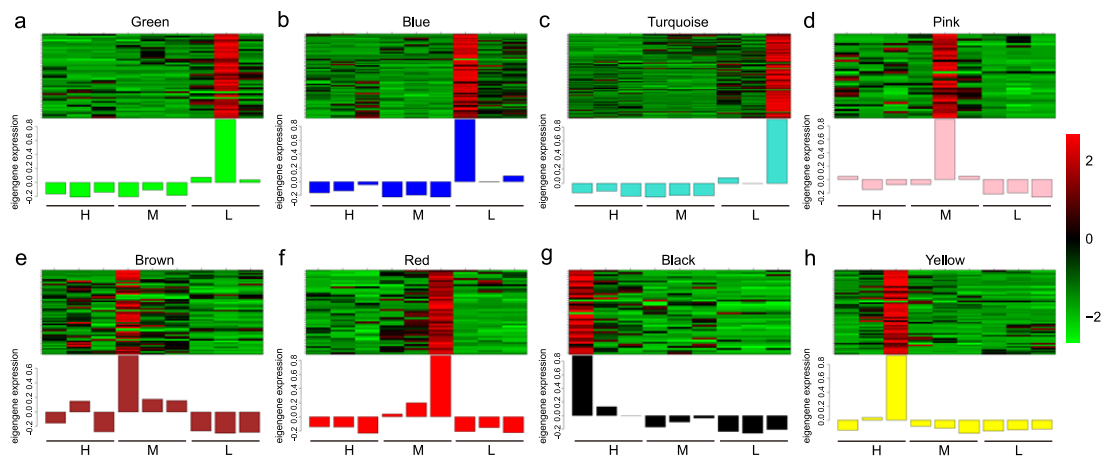

Supplementary Fig. 13 Gene expression levels of different modules in WGCNA. (a) The green represents the gene expression levels in MEgreen modules of WGCNA, (b) blue represents MEblue, (c) turquoise represents MEturquoise, (d) pink presents MEpink, (e) brown presents MEbrown, (f) red presents MEred, (g) black represents MEblack, (h) yellow represents MEyellow. The “H”, “M”, and “L” represent three samples in different PA content levels, respectively.

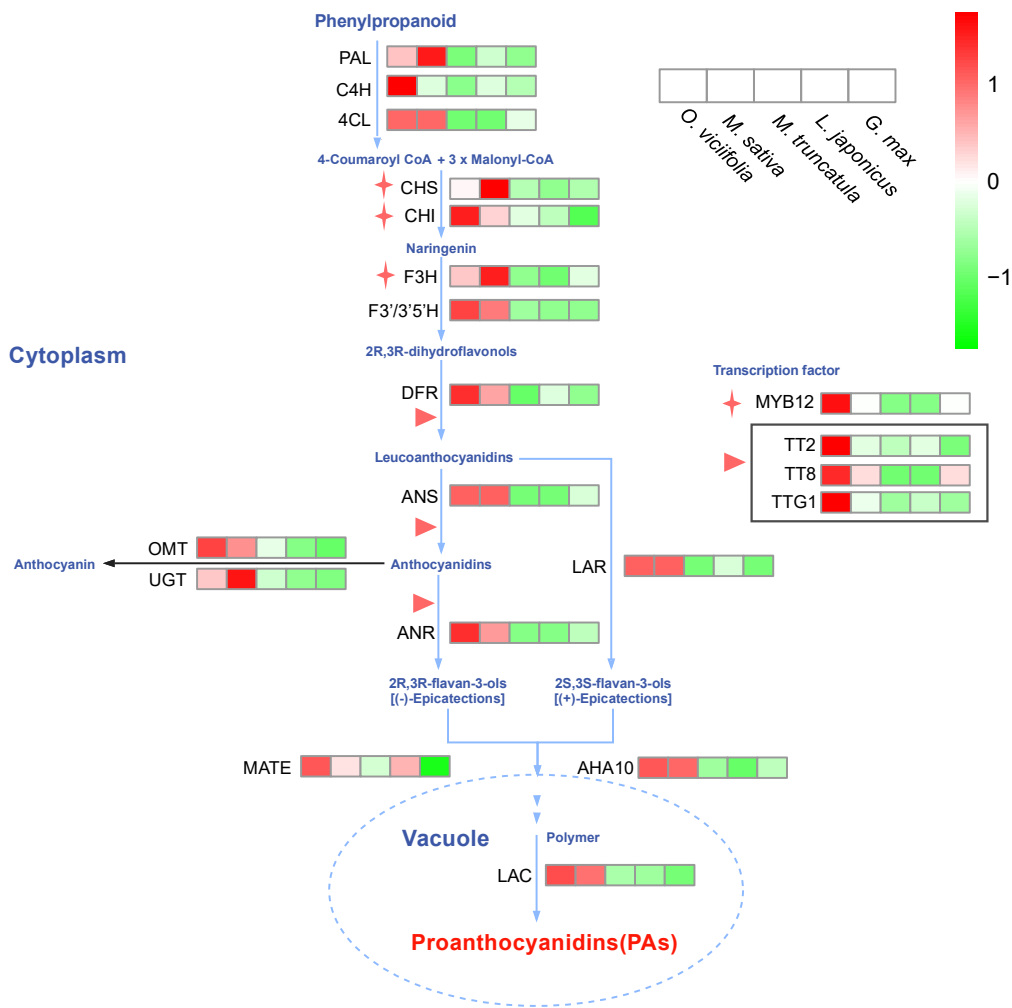

Supplementary Fig. 14 Expansion of genes involved in PA biosynthesis in five Fabales species.

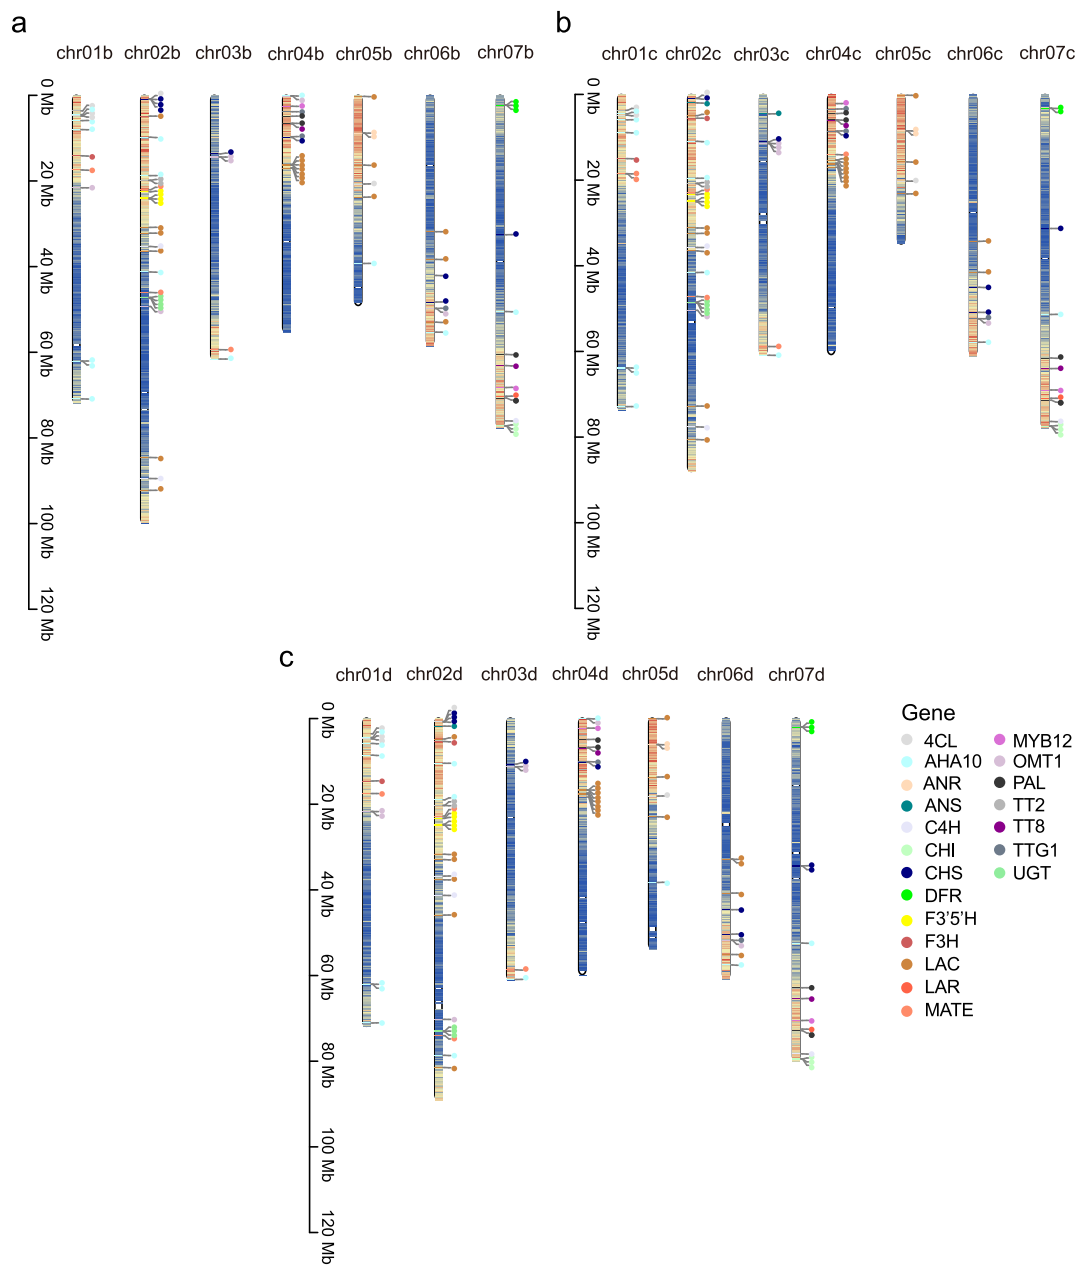

Supplementary Fig. 15 Homologous genes involved in PAs biosynthesis pathway were plotted on the seven chromosomes of haplotype B (a), C (b), and D (c), in *O. viciifolia*.

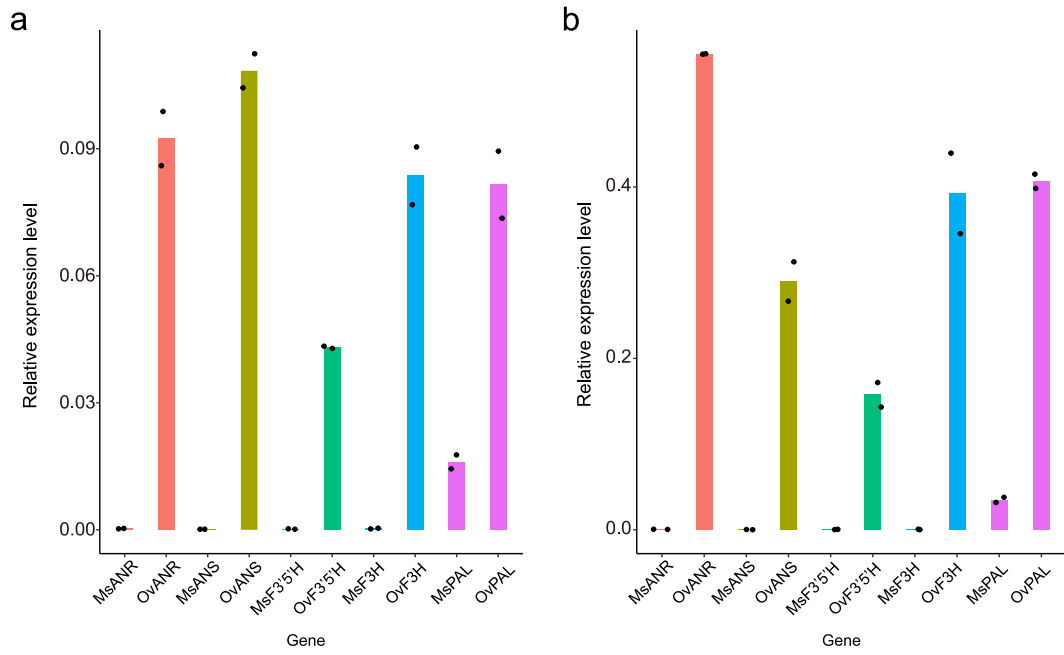

Supplementary Fig. 16 Expressions of selected genes involved in PAs biosynthesis in *O. viciifolia* and *M. sativa* by qRT-PCR (n=2). (a) EF1a as the internal gene, (b) GADPH as the internal gene.



**Supplementary Table 1 Sequencing for genome assembly of *Onobrychis viciifolia***

| Sequencing platform | Data   | Coverage (×) |
|---------------------|--------|--------------|
| Oxford Nanopore     | 200 Gb | ~109.89      |
| Illumina NovaSeq    | 175 Gb | ~96.15       |
| Hi-C                | 300 Gb | ~164.84      |
| Total               | 675 Gb | ~370.88      |

**Supplementary Table 2 Comparison of genome assemblies for *M. sativa* cultivar “Zhongmu No.4” and *O. viciifolia***

|                                         | <i>Medicago sativa</i><br>cultivar Zhongmu<br>No.4 | <i>Onobrychis</i><br><i>viciifolia</i><br>(common<br>sainfoin) |
|-----------------------------------------|----------------------------------------------------|----------------------------------------------------------------|
| Estimated genome size by flow cytometry | 3068 Mb                                            | 1851.75 Mb                                                     |
| Estimated genome size by K-mer          | 2962 Mb                                            | 1821.52 Mb                                                     |
| Total length of assembly                | 2615.86 Mb                                         | 1950.14 Mb                                                     |
| Number of total contigs                 | 49967                                              | 1044                                                           |
| Number of unanchored contigs            | 4864                                               | 547                                                            |
| Anchor rate (%)                         | 93.45                                              | 99.98                                                          |
| Contig N50                              | 2.06 Mb                                            | 10.92 Mb                                                       |
| Max. contig                             | —                                                  | 36.37 Mb                                                       |
| GC content of the genome                | 34.20%                                             | 34.62%                                                         |
| Number of annotated genes               | 146,704                                            | 109,998                                                        |
| Repetitive sequences                    | 1558 Mb                                            | 1240 Mb                                                        |
| LTR transposable element content        | 49.28%                                             | 36.14%                                                         |
| Complete BUSCOs of assembled genome     | 1588 (98.40%)                                      | 1315 (91.30%)                                                  |
| Complete BUSCOs of annotated proteins   | 1552 (96.10%)                                      | 1400 (97.20%)                                                  |

**Supplementary Table 3 Genome size for *O. viciifolia***

| Type                                                  | Number | Length     | Percent |
|-------------------------------------------------------|--------|------------|---------|
| Pseudo-chromosomes                                    | 28     | 1892.58 Mb | 97.03%  |
| Unplaced contigs (non-anchor in pseudo-chromosomes)   | 547    | 57.56 Mb   | 2.95%   |
| Nuclear (pseudo-chromosomes + non-pseudo-chromosomes) | 575    | 1950.14 Mb | 99.98%  |

**Supplementary Table 4 Summary for the genome assembly of *O. viciifolia***

| <b>Type</b>                 | <b>Length/Number</b> |
|-----------------------------|----------------------|
| Genome size (nuclear+mt+pt) | 1950.60 Mb           |
| Genome size without N       | 1950.55 Mb           |
| GC content                  | 34.62%               |
| A                           | 637.51 Mb (32.68%)   |
| T                           | 637.66 Mb (32.69%)   |
| C                           | 337.39 Mb (17.30%)   |
| G                           | 337.99 Mb (17.30%)   |
| N                           | 0.04 Mb (0.00%)      |
| Contig number               | 1044                 |
| Max. contig length          | 36.37 Mb             |
| Mean length                 | 1.87 Mb              |
| N10                         | 31.45 Mb             |
| N50                         | 10.92 Mb             |
| N90                         | 2.19 Mb              |
| Gap number                  | 467                  |
| Max. gap length             | 183 bp               |
| Mean gap length             | 91 bp                |

**Supplementary Table 5 Summary for the genome assembly of four haplotypes of *O. viciifolia***

|            |                        | Haplotype A  | Haplotype B  | Haplotype C  | Haplotype D  |
|------------|------------------------|--------------|--------------|--------------|--------------|
| Size       | Total length           | 482,865,806  | 475,108,673  | 458,438,284  | 478,171,389  |
|            |                        | bp           | bp           | bp           | bp           |
|            | Total length without N | 480,853,325  | 475,098,748  | 458,428,396  | 478,161,022  |
|            |                        | bp           | bp           | bp           | bp           |
| Nucleotide | GC content             | 34.66%       | 34.56%       | 34.60%       | 34.62%       |
|            | A                      | 32.67%       | 32.72%       | 32.70%       | 32.68%       |
|            | T                      | 32.67%       | 32.71%       | 32.70%       | 32.70%       |
|            | C                      | 17.32%       | 17.27%       | 17.29%       | 17.28%       |
|            | G                      | 17.34%       | 17.29%       | 17.32%       | 17.34%       |
| Contig     | Contig number          | 145          | 111          | 118          | 121          |
|            | Max.                   | 33,989,258   | 31,448,785   | 35,485,197   | 36,369,481   |
|            |                        | bp           | bp           | bp           | bp           |
|            | Min.                   | 32,382 bp    | 41,791 bp    | 44,740 bp    | 35,706 bp    |
|            | Mean                   | 3,316,229 bp | 4,280,168 bp | 3,884,986 bp | 3,951,743 bp |
|            | N10                    | 17,181,229   | 28,987,351   | 32,672,205   | 34,049,222   |
|            |                        | bp           | bp           | bp           | bp           |
|            | N50                    | 9,209,175 bp | 13,877,074   | 12,783,608   | 13,946,868   |
|            |                        |              | bp           | bp           | bp           |
|            | N90                    | 2,850,259 bp | 2,988,248 bp | 2,804,381 bp | 3,040,019 bp |
|            | L10                    | 2            | 2            | 2            | 2            |
|            | L50                    | 18           | 12           | 11           | 11           |
| L90        | 55                     | 43           | 38           | 41           |              |
| Scaffold   | Scaffold number        | 7            | 7            | 7            | 7            |
|            | Max.                   | 88,053,675   | 100,087,132  | 88,217,328   | 89,244,301   |
|            |                        | bp           | bp           | bp           | bp           |
|            | Min.                   | 54,058,121   | 49,294,000   | 35,106,131   | 54,048,558   |
|            |                        | bp           | bp           | bp           | bp           |
|            | Mean                   | 68,695,115   | 67,872,667   | 65,491,183   | 68,310,198   |
|            |                        | bp           | bp           | bp           | bp           |
|            | N10                    | 88,053,675   | 100,087,132  | 88,217,328   | 89,244,301   |
|            |                        | bp           | bp           | bp           | bp           |
|            | N50                    | 78,203,830   | 71,978,237   | 73,846,293   | 72,180,620   |
|            | bp                     | bp           | bp           | bp           |              |
| N90        | 54,058,121             | 49,294,000   | 60,930,978   | 54,048,558   |              |
|            | bp                     | bp           | bp           | bp           |              |
| L10        | 1                      | 1            | 1            | 1            |              |
| L50        | 3                      | 3            | 3            | 3            |              |
| L90        | 7                      | 7            | 6            | 7            |              |
| Gap        | Gap number             | 138          | 104          | 111          | 114          |
|            | Max.                   | 100 bp       | 178 bp       | 183 bp       | 116 bp       |
|            | Min.                   | 1 bp         | 37 bp        | 2 bp         | 10 bp        |

|                                  | Mean                                | 90 bp        | 95 bp        | 89 bp        | 90 bp        |
|----------------------------------|-------------------------------------|--------------|--------------|--------------|--------------|
| Assembly-<br>BUSCO               | Complete BUSCOs                     | 1292 (89.7%) | 1302 (90.4%) | 1298 (90.2%) | 1283 (89.1%) |
|                                  | Complete and single-copy BUSCOs     | 1207 (83.8%) | 1218 (84.6%) | 1209 (84.0%) | 1202 (83.5%) |
|                                  | Complete and duplicated BUSCOs      | 85 (5.9%)    | 84 (5.8%)    | 89 (6.2%)    | 81 (5.6%)    |
|                                  | Fragmented BUSCOs                   | 31 (2.2%)    | 30 (2.1%)    | 29 (2.0%)    | 26 (1.8%)    |
|                                  | Missing BUSCOs                      | 117 (8.1)    | 108 (7.5%)   | 113 (7.8%)   | 131 (9.1%)   |
|                                  | Total BUSCO groups                  | 1440         | 1440         | 1440         | 1440         |
| Annotation-<br>BUSCO             | Complete BUSCOs (C)                 | 1315 (91.3%) | 1340 (93.0%) | 1335 (92.7%) | 1318 (91.6%) |
|                                  | Complete and single-copy BUSCOs (S) | 1017 (70.6%) | 1050 (72.9%) | 1051 (73.0%) | 1068 (74.2%) |
|                                  | Complete and duplicated BUSCOs (D)  | 298 (20.7%)  | 290 (20.1%)  | 284 (19.7%)  | 250 (17.4%)  |
|                                  | Fragmented BUSCOs (F)               | 34 (2.4%)    | 23 (1.6%)    | 27 (1.9%)    | 15 (1.0%)    |
|                                  | Missing BUSCOs (M)                  | 91 (6.3%)    | 77 (5.4%)    | 78 (5.4%)    | 107 (7.4%)   |
|                                  | Total BUSCO groups searched         | 1440         | 1440         | 1440         | 1440         |
| Annotated<br>genomic<br>features | Genes                               | 27299        | 27438        | 27238        | 27162        |
|                                  | Transcript                          | 30388        | 30002        | 29568        | 29439        |
|                                  | Simple_repeat                       | 116953       | 119111       | 115011       | 118366       |
|                                  | LTR/unknown                         | 104441       | 101402       | 97537        | 105224       |
|                                  | LTR/Copia                           | 55357        | 53807        | 50677        | 53506        |
|                                  | LTR/Gypsy                           | 95249        | 90086        | 86477        | 93825        |
|                                  | LINEs                               | 910          | 874          | 891          | 861          |
|                                  | DNAs                                | 295118       | 292425       | 286425       | 299587       |

**Supplementary Table 6 Summary of all repeat elements**

| Repeat         | Superfamily    | Number    | Length (Mb) | Percentage (%) | Mean_length (bp) |
|----------------|----------------|-----------|-------------|----------------|------------------|
| LTR            | LTR_total      | 1,033,972 | 704.9       | 36.14          | 681.74           |
|                | LTR_Copia      | 218,580   | 150.23      | 7.7            | 687.31           |
|                | LTR_Gypsy      | 381,092   | 339.51      | 17.41          | 890.88           |
|                | LTR_unknown    | 434,300   | 215.16      | 11.03          | 495.43           |
| Pararetrovirus | Pararetrovirus | 302       | 0.45        | 0.02           | 1479.15          |
| LINE           | LINE           | 3,726     | 2.05        | 0.11           | 550.88           |
| DNA            | DNA_total      | 1,234,695 | 428.54      | 21.97          | 347.09           |
|                | DNA_DTA        | 154,978   | 52.8        | 2.71           | 340.64           |
|                | DNA_DTC        | 138,785   | 86.38       | 4.43           | 622.43           |
|                | DNA_DTH        | 80,651    | 22.9        | 1.18           | 283.93           |
|                | DNA_DTM        | 439,948   | 141.58      | 7.26           | 321.81           |
|                | DNA_DTT        | 46,274    | 10.4        | 0.54           | 224.65           |
|                | DNA_Helitron   | 374,059   | 114.5       | 5.87           | 306.1            |
| Unknown        | Unknown        | 313,300   | 78.09       | 4              | 249.24           |

**Supplementary Table 7 The annotated genes in the genome assembly**

| Feature    | Number | Min. | Max.   | Median | Mean   |
|------------|--------|------|--------|--------|--------|
| gene       | 109998 | 33   | 373553 | 2503   | 3722.5 |
| transcript | 130410 | 33   | 18864  | 1383   | 1564.6 |
| CDS        | 119930 | 153  | 18864  | 1119   | 1333.2 |
| exon       | 719988 | 3    | 7950   | 148    | 283.4  |
| intron     | 589578 | 4    | 364875 | 219    | 539.2  |

**Supplementary Table 8 RNA-seq data downloaded from NCBI for gene modeling**

| Bioproject  | Sample       | Accession   | Tissue         | Development stage | Location       |
|-------------|--------------|-------------|----------------|-------------------|----------------|
| PRJNA612135 | SAMN14362542 | SRR11310356 | leaf           | flowering         | China          |
| PRJNA612135 | SAMN14362541 | SRR11310357 | leaf           | flowering         | China          |
| PRJNA612135 | SAMN14362540 | SRR11310358 | leaf           | flowering         | China          |
| PRJNA612135 | SAMN14362539 | SRR11310359 | leaf           | flowering         | China          |
| PRJNA612135 | SAMN14362538 | SRR11310360 | leaf           | flowering         | China          |
| PRJNA612135 | SAMN14362537 | SRR11310361 | leaf           | flowering         | China          |
| PRJNA315368 | SAMN04556712 | SRR3229094  | shoot and root | Seedling          | Switzerland    |
| PRJNA315368 | SAMN04556713 | SRR3363169  | shoot and root | Seedling          | United Kingdom |
| PRJNA315368 | SAMN04556714 | SRR3363170  | shoot and root | Seedling          | Czech          |
| PRJNA315368 | SAMN04556711 | SRR3363171  | shoot and root | Seedling          | United Kingdom |
| PRJNA315368 | SAMN04556715 | SRR3363172  | shoot and root | Seedling          | Italy          |
| PRJNA436866 | SAMN08634426 | SRR6804700  | 14 tissues     | Several stages    | China          |

**Supplementary Table 9 Mapping rate of all sequenced reads against the genome assembly of *O. viciifolia***

| Dataset                                  | Mapped reads | Properly     |        | Mapped bases | >=1x  | >=5x  | >=10x | >=20x |
|------------------------------------------|--------------|--------------|--------|--------------|-------|-------|-------|-------|
|                                          |              | paired reads | mapped |              |       |       |       |       |
| Second-generation sequence (short reads) | 99.0%        | 96.9%        | 99.0%  | 97.1%        | 95.9% | 94.9% | 93.1% |       |
| Third-generation sequence (long reads)   | 97.1%        | -            | 97.5%  | 99.8%        | 99.4% | 99.1% | 98.4% |       |
| RNA-Seq reads                            | 91.7%        | 82.2%        | 91.7%  | 24.3%        | 14.2% | 11.2% | 8.9%  |       |

**Supplementary Table 10 BUSCO scoring for the genome assembly and annotated proteins of *O. vicifolia***

|                                                  | <b>Items</b>                    | <b>Number</b>   |
|--------------------------------------------------|---------------------------------|-----------------|
| BUSCO<br>evaluation for<br>genome assembly       | Complete BUSCOs                 | 1315<br>(91.3%) |
|                                                  | Complete and single-copy BUSCOs | 108 (7.5%)      |
|                                                  | Complete and duplicated BUSCOs  | 1207<br>(83.8%) |
|                                                  | Fragmented BUSCOs               | 23 (1.6%)       |
|                                                  | Missing BUSCOs                  | 102 (7.1%)      |
|                                                  | Total BUSCO groups              | 1440<br>(100%)  |
| BUSCO<br>evaluation for<br>annotated<br>proteins | Complete BUSCOs                 | 1400<br>(97.2%) |
|                                                  | Complete and single-copy BUSCOs | 19 (1.3%)       |
|                                                  | Complete and duplicated BUSCOs  | 1381<br>(95.9%) |
|                                                  | Fragmented BUSCOs               | 10 (0.7%)       |
|                                                  | Missing BUSCOs                  | 30 (2.1%)       |
|                                                  | Total BUSCO groups searched     | 1440<br>(100%)  |

**Supplementary Table 11 Gene annotations against the databases**

|                                   | <b>Number</b> | <b>Percentage</b> |
|-----------------------------------|---------------|-------------------|
| <b>gene</b>                       | 99518         | 100%              |
| <b>Annotated by eggNOG-mapper</b> |               |                   |
| GO                                | 49897         | 50.14%            |
| KEGG_KO                           | 47157         | 47.39%            |
| EC                                | 21021         | 21.12%            |
| KEGG_Pathway                      | 29300         | 29.44%            |
| eggNOG                            | 91309         | 91.75%            |
| COC                               | 97391         | 97.86%            |
| Unannotated                       | 2127          | 2.14%             |
| <b>Annotated by diamond</b>       |               |                   |
| Swiss_Prot                        | 74837         | 75.20%            |
| TrEMBL                            | 98195         | 98.67%            |
| NR                                | 98034         | 98.51%            |
| Arabidopsis thaliana              | 88412         | 88.84%            |
| Unannotated                       | 1257          | 1.30%             |
| <b>Annotated by InterProScan</b>  |               |                   |
| CDD                               | 34405         | 34.57%            |
| Pfam                              | 84041         | 84.45%            |
| SUPERFAMILY                       | 66244         | 66.56%            |
| PIRSF                             | 7201          | 7.24%             |
| PANTHER                           | 95594         | 96.06%            |
| Gene3D                            | 70705         | 71.05%            |
| Phobius                           | 33808         | 33.97%            |
| PRINTS                            | 15525         | 15.60%            |
| TIGRFAM                           | 11062         | 11.12%            |
| MobiDBLite                        | 38930         | 39.12%            |
| Coils                             | 16192         | 16.27%            |
| TMHMM                             | 23902         | 24.02%            |
| SMART                             | 31745         | 31.90%            |
| Unannotated                       | 1107          | 1.11%             |

**Supplementary Table 12 Summary of genomic features in the 28 psuedo-chromosomes**

| Chr   | Genes | LTR   | LINEs | DNAs  | Simple_repeat |
|-------|-------|-------|-------|-------|---------------|
| chr1a | 4128  | 42861 | 153   | 46279 | 19320         |
| chr1b | 3965  | 36727 | 106   | 46419 | 18443         |
| chr1c | 4194  | 38451 | 126   | 46183 | 18955         |
| chr1d | 4086  | 37494 | 148   | 45664 | 18935         |
| chr2a | 5703  | 44369 | 118   | 53508 | 22845         |
| chr2b | 5886  | 50885 | 135   | 61334 | 26203         |
| chr2c | 5667  | 42212 | 164   | 57472 | 23418         |
| chr2d | 5697  | 42925 | 136   | 61897 | 23184         |
| chr3a | 3040  | 33916 | 134   | 40961 | 13118         |
| chr3b | 3087  | 32418 | 166   | 37457 | 13356         |
| chr3c | 2870  | 32588 | 121   | 38269 | 12794         |
| chr3d | 2877  | 33026 | 112   | 36965 | 13281         |
| chr4a | 3503  | 32030 | 108   | 30572 | 14121         |
| chr4b | 3422  | 31337 | 80    | 30380 | 13859         |
| chr4c | 3609  | 35117 | 92    | 33118 | 13873         |
| chr4d | 3493  | 34178 | 62    | 32544 | 14625         |
| chr5a | 3683  | 27158 | 99    | 38160 | 14087         |
| chr5b | 3736  | 21737 | 89    | 32271 | 13958         |
| chr5c | 3411  | 12763 | 74    | 25351 | 11718         |
| chr5d | 3650  | 30935 | 113   | 33670 | 13661         |
| chr6a | 3024  | 33828 | 136   | 35869 | 13650         |
| chr6b | 3036  | 31800 | 110   | 34919 | 13583         |
| chr6c | 3166  | 33279 | 125   | 36035 | 13646         |
| chr6d | 2975  | 32719 | 116   | 37032 | 14297         |
| chr7a | 4218  | 40885 | 162   | 49769 | 19812         |
| chr7b | 4306  | 40391 | 188   | 49645 | 19709         |
| chr7c | 4321  | 40281 | 189   | 49997 | 20607         |
| chr7d | 4384  | 41278 | 174   | 51815 | 20383         |



**Supplementary Table 13 The length of genomic features in the 28 psuedo-chromosomes (Mbp)**

| Chr   | Gene   | LTR    | LINE  | DNA    | Simple repeat |
|-------|--------|--------|-------|--------|---------------|
| chr1a | 17.280 | 30.169 | 0.092 | 15.667 | 0.841         |
| chr1b | 16.371 | 25.156 | 0.058 | 15.249 | 0.792         |
| chr1c | 16.341 | 26.355 | 0.065 | 15.273 | 0.819         |
| chr1d | 17.387 | 25.103 | 0.077 | 15.399 | 0.816         |
| chr2a | 21.595 | 29.489 | 0.062 | 17.498 | 0.984         |
| chr2b | 22.039 | 34.001 | 0.075 | 20.026 | 1.154         |
| chr2c | 21.404 | 27.908 | 0.103 | 18.641 | 0.999         |
| chr2d | 21.458 | 28.796 | 0.072 | 19.100 | 0.981         |
| chr3a | 10.354 | 23.510 | 0.069 | 16.506 | 0.605         |
| chr3b | 10.284 | 22.707 | 0.079 | 16.606 | 0.606         |
| chr3c | 10.896 | 23.466 | 0.066 | 15.104 | 0.577         |
| chr3d | 10.789 | 23.751 | 0.065 | 15.185 | 0.607         |
| chr4a | 11.871 | 23.507 | 0.053 | 10.878 | 0.603         |
| chr4b | 10.932 | 22.329 | 0.049 | 10.611 | 0.616         |
| chr4c | 10.844 | 25.827 | 0.052 | 12.159 | 0.591         |
| chr4d | 12.008 | 24.031 | 0.038 | 11.891 | 0.635         |
| chr5a | 14.229 | 17.558 | 0.052 | 10.619 | 0.586         |
| chr5b | 13.881 | 13.907 | 0.045 | 10.212 | 0.584         |
| chr5c | 12.875 | 6.850  | 0.037 | 7.182  | 0.479         |
| chr5d | 12.984 | 19.265 | 0.069 | 10.228 | 0.573         |
| chr6a | 11.853 | 23.990 | 0.081 | 12.843 | 0.585         |
| chr6b | 11.576 | 22.494 | 0.064 | 12.850 | 0.576         |
| chr6c | 11.241 | 24.417 | 0.068 | 12.958 | 0.596         |
| chr6d | 11.439 | 23.960 | 0.067 | 13.177 | 0.630         |
| chr7a | 16.257 | 27.912 | 0.104 | 16.279 | 0.851         |
| chr7b | 16.373 | 27.243 | 0.104 | 16.474 | 0.847         |
| chr7c | 16.734 | 26.645 | 0.094 | 16.273 | 0.899         |
| chr7d | 16.500 | 28.277 | 0.101 | 16.796 | 0.896         |

**Supplementary Table 14 Annotation information of four haplotypes**

|                           | <b>Haploid A</b> | <b>Haploid B</b> | <b>Haploid C</b> | <b>Haploid D</b> |
|---------------------------|------------------|------------------|------------------|------------------|
| Number of genes           | 27299            | 27438            | 27238            | 27162            |
| Number of annotated genes | 24837            | 24841            | 24742            | 24725            |
| COG                       | 97.92%           | 97.81%           | 97.91%           | 97.87%           |
| GO                        | 50.18%           | 50.20%           | 50.11%           | 50.15%           |
| EC                        | 21.09%           | 20.89%           | 21.21%           | 21.27%           |
| KEGG_KO                   | 41.07%           | 41.22%           | 41.09%           | 41.45%           |
| KEGG_Pathway              | 23.27%           | 23.43%           | 23.24%           | 23.77%           |
| eggNOG                    | 91.77%           | 91.86%           | 91.78%           | 91.66%           |
| Swiss_Prot                | 75.42%           | 75.25%           | 75.09%           | 75.21%           |
| TrEMBL                    | 98.69%           | 98.60%           | 98.71%           | 98.72%           |
| NR                        | 98.53%           | 98.45%           | 98.53%           | 98.57%           |
| A.thaliana                | 89.09%           | 88.80%           | 88.90%           | 88.78%           |
| CDD                       | 34.42%           | 34.58%           | 35.04%           | 34.51%           |
| Coils                     | 16.46%           | 16.24%           | 16.31%           | 16.17%           |
| Gene3D                    | 70.87%           | 71.10%           | 71.17%           | 71.27%           |
| MobiDBLite                | 39.18%           | 39.10%           | 39.44%           | 39.01%           |
| PANTHER                   | 96.15%           | 96.12%           | 96.20%           | 95.90%           |
| Pfam                      | 84.50%           | 84.62%           | 84.49%           | 84.31%           |
| Phobius                   | 34.13%           | 33.71%           | 34.23%           | 33.88%           |
| PIRSF                     | 7.28%            | 7.26%            | 7.27%            | 7.14%            |
| PRINTS                    | 15.55%           | 15.58%           | 15.44%           | 15.85%           |
| SMART                     | 31.78%           | 31.96%           | 32.20%           | 31.85%           |
| SUPERFAMILY               | 66.35%           | 66.52%           | 66.75%           | 66.82%           |
| TIGRFAM                   | 11.02%           | 11.18%           | 11.02%           | 11.18%           |
| TMHMM                     | 24.24%           | 23.82%           | 24.17%           | 23.86%           |

**Supplementary Table 15 KEGG analysis for the genes specifically found in haploids B, C, and D, compared to haploid A**

| Haploid   | Description                       | GeneRatio | p.adjust    |
|-----------|-----------------------------------|-----------|-------------|
| Haploid B | Oxidative phosphorylation         | 28/626    | 1.44E-06    |
|           | Fructose and mannose metabolism   | 16/626    | 0.001562475 |
| Haploid C | Oxidative phosphorylation         | 23/581    | 3.73E-05    |
|           | Diterpenoid biosynthesis          | 14/581    | 0.000229412 |
|           | Flavone and flavonol biosynthesis | 5/581     | 0.012283588 |
|           | Arginine and proline metabolism   | 12/581    | 0.017199877 |
| Haploid D | Fructose and mannose metabolism   | 24/640    | 2.41E-06    |
|           | Oxidative phosphorylation         | 27/640    | 1.24E-05    |

**Supplementary Table 16 LAI of five selected legume species**

| Species (Version)                       | raw LAI | LAI   |
|-----------------------------------------|---------|-------|
| <i>C. arietinum</i> (ASM33114v1)        | 2.77    | 3.67  |
| <i>C. cajan</i> (C.cajan_V1.1)          | 2.85    | 3.79  |
| <i>M. truncatula</i> (MtrunA17r5.0-ANR) | 10.70   | 10.72 |
| <i>V. radiata</i> (Vradiata_ver6)       | 2.35    | 6.50  |
| <i>O. viciifolia</i> Haplotype A        | 10.90   | 6.49  |
| <i>O. viciifolia</i> Haplotype B        | 10.90   | 5.79  |
| <i>O. viciifolia</i> Haplotype C        | 11.28   | 7.05  |
| <i>O. viciifolia</i> Haplotype D        | 10.11   | 4.48  |

**Supplementary Table 17 Quality value estimation for the whole genome**

|              | Quality value | Error rate  |
|--------------|---------------|-------------|
| Whole genome | 33.3884       | 0.000458311 |
| Haplotype A  | 33.527        | 0.00044392  |
| Haplotype B  | 33.879        | 0.000409352 |
| Haplotype C  | 33.6277       | 0.000433741 |
| Haplotype D  | 33.7472       | 0.000421964 |

Note: quality values were calculated by using Merqury based on short reads.

**Supplementary Table 18 KEGG enrichment analysis for the unique gene families in *O. viciifolia***

| Description                                 | GeneRatio | pvalue      | p.adjust    | qvalue      |
|---------------------------------------------|-----------|-------------|-------------|-------------|
| Zeatin biosynthesis                         | 18/181    | 8.54645E-16 | 6.40984E-14 | 5.03791E-14 |
| Taurine and hypotaurine metabolism          | 5/181     | 1.18265E-05 | 0.0004434   | 0.0003485   |
| Alanine, aspartate and glutamate metabolism | 8/181     | 2.50981E-05 | 0.0006274   | 0.0004931   |
| Mismatch repair                             | 8/181     | 4.23236E-05 | 0.0007935   | 0.0006237   |
| Butanoate metabolism                        | 5/181     | 6.62994E-05 | 0.0009944   | 0.0007816   |
| DNA replication                             | 8/181     | 0.000137345 | 0.001716807 | 0.001349305 |
| Pentose and glucuronate interconversions    | 11/181    | 0.000409714 | 0.004389796 | 0.003450225 |
| beta-Alanine metabolism                     | 5/181     | 0.002203289 | 0.020655832 | 0.016234759 |
| Nucleotide excision repair                  | 6/181     | 0.005511371 | 0.04592809  | 0.036097867 |

**Supplementary Table 19 KEGG enrichment analysis for the retained genes of *O. viciifolia* experienced PWGD event**

| Description                       | GeneRatio | pvalue      | p.adjust    | qvalue      |
|-----------------------------------|-----------|-------------|-------------|-------------|
| Plant hormone signal transduction | 76/1285   | 7.28919E-08 | 8.89282E-06 | 8.1332E-06  |
| Endocytosis                       | 45/1285   | 0.000145341 | 0.007423673 | 0.006789554 |
| MAPK signaling pathway - plant    | 41/1285   | 0.000182549 | 0.007423673 | 0.006789554 |

**Supplementary Table 20 GO analysis in biological process for the retained genes of *O. viciifolia* experienced PWGD event**

| Description                                                                            | GeneRatio | p.adjust    |
|----------------------------------------------------------------------------------------|-----------|-------------|
| Intracellular signal transduction                                                      | 93/1783   | 6.01146E-05 |
| Response to gibberellin                                                                | 43/1783   | 0.000235707 |
| Response to ethylene                                                                   | 57/1783   | 0.000993085 |
| Molecular transducer activity                                                          | 67/1783   | 0.000993085 |
| Obsolete transcription regulator recruiting activity                                   | 32/1783   | 0.000993085 |
| Obsolete RNA polymerase II transcription regulator Recruiting activity                 | 32/1783   | 0.000993085 |
| DNA-binding transcription factor activity, RNA Polymerase II-specific                  | 46/1783   | 0.001197222 |
| Response to abscisic acid                                                              | 107/1783  | 0.001254353 |
| Hormone-mediated signaling pathway                                                     | 99/1783   | 0.001494376 |
| Obsolete transcription factor activity, RNA Polymerase II transcription factor binding | 33/1783   | 0.001494376 |
| Signaling receptor activity                                                            | 61/1783   | 0.001494376 |
| Cellular response to acid chemical                                                     | 81/1783   | 0.001494376 |
| Obsolete transcription factor activity, transcription Factor binding                   | 34/1783   | 0.001494376 |
| Response to water deprivation                                                          | 83/1783   | 0.001549386 |
| Response to water                                                                      | 83/1783   | 0.00201093  |
| Response to chitin                                                                     | 41/1783   | 0.002456404 |
| Response to organonitrogen compound                                                    | 62/1783   | 0.002654855 |
| Transmembrane receptor protein serine/threonine Kinase activity                        | 46/1783   | 0.003594933 |
| Enzyme linked receptor protein signaling pathway                                       | 47/1783   | 0.003783957 |
| Transmembrane receptor protein serine/threonine Kinase signaling pathway               | 46/1783   | 0.003783957 |
| Response to cold                                                                       | 77/1783   | 0.00485397  |
| Regulatory region nucleic acid binding                                                 | 76/1783   | 0.005471589 |
| Reproductive shoot system development                                                  | 80/1783   | 0.005540254 |
| Obsolete transcription factor activity, protein binding                                | 34/1783   | 0.006164479 |
| Flower development                                                                     | 77/1783   | 0.006164479 |
| Transmembrane signaling receptor activity                                              | 52/1783   | 0.008616226 |
| Transmembrane receptor protein kinase activity                                         | 47/1783   | 0.01015707  |
| Root system development                                                                | 101/1783  | 0.010385832 |
| Abscisic acid-activated signaling pathway                                              | 32/1783   | 0.014325512 |
| Root development                                                                       | 100/1783  | 0.014325512 |
| Cellular response to ethylene stimulus                                                 | 24/1783   | 0.015166633 |
| Root epidermal cell differentiation                                                    | 31/1783   | 0.026505843 |

|                                         |         |             |
|-----------------------------------------|---------|-------------|
| Response to auxin                       | 64/1783 | 0.029127263 |
| Regulation of reproductive process      | 65/1783 | 0.029211457 |
| Peptidyl-serine phosphorylation         | 20/1783 | 0.029469616 |
| Peptidyl-serine modification            | 20/1783 | 0.036149313 |
| Plant organ morphogenesis               | 83/1783 | 0.038145184 |
| Phosphorelay signal transduction system | 22/1783 | 0.048255603 |

**Supplementary Table 21 Statistics of chromosomal fissions and fusions in the processes of karyotype evolution**

| The species evolved from Ancestor1 | Fission events | Fusion events |
|------------------------------------|----------------|---------------|
| <i>L. japonicus</i>                | 29             | 30            |
| <i>O. viciifolia</i>               | 16             | 16            |
| <i>C. arietinum</i>                | 24             | 23            |
| <i>P. sativum</i>                  | 26             | 26            |
| <i>M. truncatula</i>               | 21             | 20            |
| <i>M. sativa</i>                   | 22             | 21            |

**Supplementary Table 22 The 41 sainfoin accessions for phenotypic traits**

| <b>No.</b> | <b>Accession</b>    | <b>Region</b>         |
|------------|---------------------|-----------------------|
| 1          | PI 306693 88i SD    | Emilia-Romagna Italy  |
| 2          | PI 502554 87i SD    | Russian Federation    |
| 3          | PI 319062 88i SD    | Spain                 |
| 4          | PI 318604 88i SD    | Switzerland           |
| 5          | PI 234822 88i SD    | Switzerland           |
| 6          | PI 236486 2017i SD  | Turkey                |
| 7          | PI 225728 2017i SD  | Turkey                |
| 8          | PI 206459 88i SD    | Turkey                |
| 9          | PI 206458 88i SD    | Turkey                |
| 10         | PI 205202 88i SD    | Turkey                |
| 11         | PI 205200 88i SD    | Turkey                |
| 12         | PI 204594 88i SD    | Turkey                |
| 13         | PI 200872 90i SD    | Turkey                |
| 14         | PI 273785 88i SD    | Ukraine               |
| 15         | PI 639688 20110 SD  | Wyoming United states |
| 16         | PI 201512 2007i SD  | —                     |
| 17         | PI 192995 89i SD    | —                     |
| 18         | PI 316296 87i SD    | Former Soviet Union   |
| 19         | PI 313060 87i SD    | Former Soviet Union   |
| 20         | PI 313054 87i SD    | Former Soviet Union   |
| 21         | PI 313053 87i SD    | Former Soviet Union   |
| 22         | PI 258777 88i SD    | Former Soviet Union   |
| 23         | PI 258774 88i SD    | Former Soviet Union   |
| 24         | PI 258771 88i SD    | Former Soviet Union   |
| 25         | PI 258768 88i SD    | Former Soviet Union   |
| 26         | PI 258767 88i SD    | Former Soviet Union   |
| 27         | PI 110404 88i SD    | Former Soviet Union   |
| 28         | PI 110400 88i SD    | Former Soviet Union   |
| 29         | PI 239959 88i SD    | Iran                  |
| 30         | PI 2399598 2011i SD | Iran                  |
| 31         | PI 229613 82i SD    | Iran                  |
| 32         | PI 229613 88i SD    | Iran                  |
| 33         | PI 227373 82i SD    | Iran                  |
| 34         | PI 223389 88i SD    | Iran                  |
| 35         | PI 201865 2007i SD  | Iran                  |
| 36         | PI 440577 86i SD    | Kazakhstan            |
| 37         | PI 251160 2010i SD  | Macedonia             |
| 38         | PI 338651 88i SD    | Morocco               |
| 39         | PI 494668 86i SD    | Romania               |

|    |                  |         |
|----|------------------|---------|
| 40 | PI 494667 86i SD | Romania |
| 41 | PI 319713 88i SD | Romania |

**Supplementary Table 23 Phenotype details of 59 individuals for 41 sainfoin accessions**

| PI                  | CPA   | RNA-seq | PI                 | CPA  | RNA-seq |
|---------------------|-------|---------|--------------------|------|---------|
| PI 110400 88i SD    | 28.88 | S1      | PI 225728 2017i SD | 9.61 | -       |
| PI 338651 88i SD    | 28.83 | S2      | PI 234822 88i SD   | 9.35 | -       |
| PI 494667 86i SD    | 28.37 | S3      | PI 201865 2007i SD | 9.35 | -       |
| PI 205202 88i SD    | 24.61 | -       | PI 319713 88i SD   | 9.03 | -       |
| PI 205200 88i SD    | 21.79 | -       | PI 229613 88i SD   | 8.71 | -       |
| PI 258767 88i SD    | 21.49 | -       | PI 239959 88i SD   | 8.56 | -       |
| PI 251160 2010i SD  | 20.67 | -       | PI 258768 88i SD   | 8.55 | -       |
| PI 110400 88i SD    | 20.03 | -       | PI 306693 88i SD   | 8.5  | -       |
| PI 258771 88i SD    | 18.52 | -       | PI 204594 88i SD   | 8.49 | -       |
| PI 110404 88i SD    | 18.08 | -       | PI 494668 86i SD   | 8.15 | -       |
| PI 200872 90i SD    | 18.01 | -       | PI 204594 88i SD   | 8.01 | -       |
| PI 319062 88i SD    | 16.07 | -       | PI 338651 88i SD   | 7.97 | -       |
| PI 206459 88i SD    | 15.13 | -       | PI 223389 88i SD   | 7.57 | -       |
| PI 319062 88i SD    | 14.73 | -       | PI 236486 2017i SD | 7.53 | -       |
| PI 2399598 2011i SD | 14.4  | S4      | PI 110404 88i SD   | 6.99 | -       |
| PI 258767 88i SD    | 14.3  | S5      | PI 440577 86i SD   | 6.86 | -       |
| PI 2399598 2011i SD | 14.07 | S6      | PI 313060 87i SD   | 6.82 | -       |
| PI 227373 82i SD    | 14.03 | -       | PI 258774 88i SD   | 6.79 | -       |
| PI 223389 88i SD    | 13.74 | -       | PI 313053 87i SD   | 6.76 | -       |
| PI 236486 2017i SD  | 13.65 | -       | PI 273785 88i SD   | 6.67 | -       |
| PI 494667 86i SD    | 13.65 | -       | PI 200872 90i SD   | 6.51 | -       |
| PI 110404 88i SD    | 12.87 | -       | PI 639688 20110 SD | 6.43 | -       |
| PI 258771 88i SD    | 11.94 | -       | PI 502554 87i SD   | 5.95 | -       |
| PI 236486 2017i SD  | 11.61 | -       | PI 258777 88i SD   | 5.25 | -       |
| PI 639688 20110 SD  | 11.57 | -       | PI 229613 82i SD   | 5.22 | -       |
| PI 313054 87i SD    | 11.53 | -       | PI 318604 88i SD   | 5.14 | -       |
| PI 201512 2007i SD  | 11.18 | -       | PI 316296 87i SD   | 5.04 | S7      |
| PI 110404 88i SD    | 10.58 | -       | PI 502554 87i SD   | 4.9  | S8      |
| PI 110404 88i SD    | 9.76  | -       | PI 192995 89i SD   | 4.5  | S9      |
| PI 205200 88i SD    | 9.65  | -       | -                  | -    | -       |

Note: Nine lines were selected to do RNA-Seq in leaves, which are highlighted in red. CPA: Content of PAs (mg/g); DMW: Dry matter weight (g); NH: Natural height (cm); VH: Vertical height (cm); BN: Branch number; CL: Compound leaf number; LN: Leaflet number; SH: Shoot height (cm); SD: Stem diameter (mm); CLL: Compound leaf length (cm); LA: Leaflet area (cm<sup>2</sup>); LP: Leaflet perimeter (cm); LL: Leaflet length (cm); LW: Leaflet width (cm); LR: Leaflet roundness.



**Supplementary Table 24 RNA-seq data and their alignment rates**

| <b>Alignment Rate</b>             | <b>S1</b>  | <b>S2</b>  | <b>S3</b>  | <b>S4</b>  | <b>S5</b>  | <b>S6</b>  | <b>S7</b>  | <b>S8</b>  | <b>S9</b>  |
|-----------------------------------|------------|------------|------------|------------|------------|------------|------------|------------|------------|
| Raw pair-end reads in RNA-Seq     | 19,223,311 | 26,346,213 | 21,137,035 | 22,948,386 | 26,122,305 | 22,763,170 | 28,294,622 | 23,141,563 | 22,842,530 |
| Overall alignment rate            |            |            |            |            |            |            |            |            |            |
| against the whole genome assembly | 90.88%     | 90.96%     | 90.33%     | 92.66%     | 91.89%     | 93.30%     | 90.13%     | 90.52%     | 91.08%     |
| Alignment rate against haploid a  | 82.68%     | 80.86%     | 82.58%     | 82.36%     | 82.76%     | 83.49%     | 81.17%     | 81.69%     | 82.71%     |
| Alignment rate against haploid b  | 85.65%     | 85.31%     | 86.16%     | 83.06%     | 83.81%     | 83.36%     | 85.04%     | 84.56%     | 85.93%     |
| Alignment rate against haploid c  | 83.81%     | 82.83%     | 83.82%     | 82.10%     | 82.74%     | 82.12%     | 82.08%     | 82.69%     | 83.38%     |
| Alignment rate against haploid d  | 85.08%     | 85.19%     | 86.22%     | 82.72%     | 83.20%     | 82.73%     | 85.19%     | 84.48%     | 86.11%     |

**Supplementary Table 25 The DEGs in the MEblack gene module showing a significant correlation with high PA content**

| Gene             | Gene ID annotated in            |                            | Function                                                               | Name                          |
|------------------|---------------------------------|----------------------------|------------------------------------------------------------------------|-------------------------------|
|                  | <i>Arabidopsis thaliana</i> and | <i>Medicago truncatula</i> |                                                                        |                               |
| LeOno01bG0060000 | NP_850047.1                     |                            | Ribosomal protein L35                                                  | plastid ribosomal protein L35 |
| LeOno02cG0320800 | NP_191670.1                     |                            | ribosomal protein S27                                                  | ARS27A                        |
| LeOno02bG0413700 | NP_193086.1                     |                            | transmembrane protein                                                  | T6G15.50                      |
| LeOno01dG0100700 | NP_201090.1                     |                            | Phosphoglycerate mutase family protein                                 | MQB2.16                       |
| LeOno02aG0164800 | NP_001185189.1                  |                            | transmembrane protein                                                  | AT1G50732                     |
| LeOno01dG0095300 | NP_201078.1                     |                            | Integral membrane HPP family protein                                   | MQB2.4                        |
| LeOno02bG0441400 | NP_186902.1                     |                            | TCP-1/cpn60 chaperonin family protein                                  | F16B3.16                      |
| LeOno02bG0282100 | NP_194433.1                     |                            | fatty acid desaturase A                                                | F10M23.370                    |
| LeOno01dG0228900 | NP_001117487.1                  |                            | linoleate 9S-lipoxygenase-4 protein, putative<br>(DUF581)              | AT1G53903                     |
| LeOno02aG0026300 | NP_001318886.1                  |                            | nitrogen fixation S (NIFS)-like 1                                      | ATNFS1                        |
| LeOno04bG0003700 | NP_567198.1                     |                            | ATPase, F1 complex, OSCP/delta subunit protein                         | AT4G00895                     |
| LeOno02cG0196400 | NP_001331391.1                  |                            | NagB/RpiA/CoA transferase-like superfamily protein                     | MFC16.20                      |
| LeOno02cG0082200 | NP_001030831.1                  |                            | breast basic conserved 1                                               | 40S RIBOSOMAL PROTEIN         |
| LeOno01cG0390200 | NP_001327480.1                  |                            | RING/U-box superfamily protein                                         | AT3G25030                     |
| LeOno01aG0386500 | NP_177245.1                     |                            | MLP-like protein 43                                                    | F15H11.12                     |
| LeOno02aG0468900 | NP_001319452.1                  |                            | Ribosomal protein S7e family protein                                   | F16B3.19                      |
| LeOno01dG0381600 | NP_177241.3                     |                            | MLP-like protein 31                                                    | F15H11.9                      |
| LeOno02aG0154300 | NP_190560.1                     |                            | Translation protein SH3-like family protein                            | F3A4.4                        |
| LeOno02aG0012600 | NP_001031700.1                  |                            | leucoanthocyanidin dioxygenase                                         | ANS                           |
| LeOno02bG0564000 | NP_190560.1                     |                            | Translation protein SH3-like family protein                            | F3A4.4                        |
| LeOno02cG0505200 | NP_177217.1                     |                            | Ribosomal protein L18e/L15 superfamily protein                         | F24J13.17                     |
| LeOno02bG0445400 | NP_198590.1                     |                            | Calcium-dependent lipid-binding (CaLB domain)<br>family protein        | K12B20.22                     |
| LeOno01cG0190000 | XP_013445079.1                  |                            | repetitive proline-rich cell wall protein 1-like                       | LOC25501074                   |
| LeOno02bG0568100 | NP_001331062.1                  |                            | Ribonuclease E inhibitor RraA/Dimethylmenaquinone<br>methyltransferase | K24C1.7                       |
| LeOno01dG0002800 | NP_199787.2                     |                            | Leucine-rich repeat protein kinase family protein                      | K2I5.13                       |
| LeOno02aG0256700 | NP_177605.2                     |                            | Gibberellin-regulated family protein                                   | F1M20.35                      |
| LeOno02aG0544100 | NP_190560.1                     |                            | Translation protein SH3-like family protein                            | F3A4.4                        |
| LeOno01dG0395500 | NP_001326155.1                  |                            | Ribosomal L18p/L5e family protein                                      | AT3G45020                     |
| LeOno01aG0137700 | NP_191346.1                     |                            | sumo conjugation enzyme 1                                              | AHUS5                         |
| LeOno01aG0112800 | NP_001077760.1                  |                            | Class I peptide chain release factor                                   | AT1G62850                     |
| LeOno02aG0089000 | XP_039684440.1                  |                            | uncharacterized LOC120577328                                           | LOC120577328                  |
| LeOno01aG0174700 | NP_180462.2                     |                            | Leucine-rich repeat protein kinase family protein                      | T9I4.4                        |
| LeOno02cG0183000 | NP_196772.1                     |                            | elongation factor 1-beta 1                                             | MXC9.7                        |
| LeOno01aG0105200 | NP_196945.1                     |                            | hypothetical protein                                                   | F18O22.200                    |
| LeOno02aG0125100 | -                               |                            | -                                                                      | -                             |

|                  |   |       |   |
|------------------|---|-------|---|
| LeOno01cG0092000 | - | ncRNA | - |
| LeOno01cG0091900 | - | ncRNA | - |
| LeOno01aG0091100 | - | ncRNA | - |

---

**Supplementary Table 26 The reference genes used for gene copy number determination in autotetraploid *O. viciifolia* and *M. sativa***

| Gene    | Gene ID         | Species                     |
|---------|-----------------|-----------------------------|
| AtPAL   | AT2G37040       | <i>Arabidopsis thaliana</i> |
| AtC4H   | AT2G30490       | <i>Arabidopsis thaliana</i> |
| At4Cl5  | AT3G21230.1     | <i>Arabidopsis thaliana</i> |
| AtCHI   | AT3G55120.1     | <i>Arabidopsis thaliana</i> |
| AtCHS   | AT5G13930.1     | <i>Arabidopsis thaliana</i> |
| F3H     | AT3G51240.1     | <i>Arabidopsis thaliana</i> |
| F3'5'H  | NC_012012.3     | <i>Vitis vinifera</i>       |
| DFR     | AT5G42800       | <i>Arabidopsis thaliana</i> |
| AtANS   | AT4G22880       | <i>Arabidopsis thaliana</i> |
| ANR     | VIT_00006396001 | <i>Vitis vinifera</i>       |
| UGT     | AT4G15280       | <i>Arabidopsis thaliana</i> |
| OMT1    | AT5G54160       | <i>Arabidopsis thaliana</i> |
| LAR1    | VIT_00011958001 | <i>Vitis vinifera</i>       |
| MATE    | NC_027769.2     | <i>Glycine max</i>          |
| AHA10   | AT1G17260       | <i>Arabidopsis thaliana</i> |
| ATLAC15 | AT5G48100       | <i>Arabidopsis thaliana</i> |
| TT2     | AT5G35550       | <i>Arabidopsis thaliana</i> |
| TT8     | AT4G09820       | <i>Arabidopsis thaliana</i> |
| TTG1    | AT5G24520       | <i>Arabidopsis thaliana</i> |
| MYB12   | AT2G47460       | <i>Arabidopsis thaliana</i> |

**Supplementary Table 27 Relative expressions of genes involved in PA biosynthesis pathway in leaves of *O. vicifolia* and *M. sativa*.**

|        | GADPH    |          |          |         | CYP      |          |          |         | EF1a     |          |          |         |
|--------|----------|----------|----------|---------|----------|----------|----------|---------|----------|----------|----------|---------|
|        | H-       | M-       | L-       |         | H-       | M-       | L-       |         | H-       | M-       | L-       |         |
|        | Sainfoin | Sainfoin | Sainfoin | Alfalfa | Sainfoin | Sainfoin | Sainfoin | Alfalfa | Sainfoin | Sainfoin | Sainfoin | Alfalfa |
| PAL    | 1.0733   | 0.9267   | 0.8458   | 0.1604  | 0.1308   | 0.1146   | 0.0947   | 1.5503  | 0.1698   | 0.1686   | 0.1152   | 0.9774  |
| C4H    | 0.6272   | 0.5764   | 0.7121   | 0.0257  | 0.0764   | 0.0712   | 0.0797   | 0.2480  | 0.0992   | 0.1049   | 0.0970   | 0.1563  |
| 4CI    | 0.2112   | 0.1731   | 0.2571   | 0.0319  | 0.0257   | 0.0214   | 0.0288   | 0.3083  | 0.0334   | 0.0315   | 0.0350   | 0.1944  |
| CHI    | 0.5970   | 0.5092   | 0.5810   | 0.0005  | 0.0727   | 0.0629   | 0.0651   | 0.0044  | 0.0944   | 0.0926   | 0.0791   | 0.0028  |
| CHS    | 4.1487   | 3.0978   | 3.5476   | 0.0002  | 0.5055   | 0.3829   | 0.3972   | 0.0020  | 0.6563   | 0.5635   | 0.4832   | 0.0013  |
| F3H    | 0.6272   | 0.3646   | 0.3959   | 0.0009  | 0.0764   | 0.0451   | 0.0443   | 0.0089  | 0.0992   | 0.0663   | 0.0539   | 0.0056  |
| F3'5'H | 0.5948   | 0.2037   | 0.3445   | 0.0007  | 0.0725   | 0.0252   | 0.0386   | 0.0069  | 0.0941   | 0.0371   | 0.0469   | 0.0044  |
| DFR    | 0.1616   | 0.0407   | 0.0925   | 0.0000  | 0.0197   | 0.0050   | 0.0104   | 0.0000  | 0.0256   | 0.0074   | 0.0126   | 0.0000  |
| ANS    | 1.0560   | 0.2363   | 0.7841   | 0.0001  | 0.1287   | 0.0292   | 0.0878   | 0.0008  | 0.1671   | 0.0430   | 0.1068   | 0.0005  |
| ANR    | 1.2651   | 0.2994   | 0.5887   | 0.0000  | 0.1541   | 0.0370   | 0.0659   | 0.0000  | 0.2001   | 0.0545   | 0.0802   | 0.0000  |
| UGT    | 1.3254   | 1.9878   | 1.9357   | 0.0056  | 0.1615   | 0.2457   | 0.2168   | 0.0541  | 0.2097   | 0.3616   | 0.2637   | 0.0341  |
| OMT1   | 1.5733   | 0.7026   | 2.3445   | 0.0212  | 0.1917   | 0.0869   | 0.2625   | 0.2046  | 0.2489   | 0.1278   | 0.3193   | 0.1290  |
| LAR    | 0.0409   | 0.0428   | 0.0308   | 0.0000  | 0.0050   | 0.0053   | 0.0035   | 0.0000  | 0.0065   | 0.0078   | 0.0042   | 0.0000  |
| MATE   | 0.1164   | 0.1283   | 0.1080   | 0.0305  | 0.0142   | 0.0159   | 0.0121   | 0.2943  | 0.0184   | 0.0233   | 0.0147   | 0.1855  |
| AHA10  | 0.9935   | 1.1202   | 1.2288   | 0.0855  | 0.1211   | 0.1385   | 0.1376   | 0.8266  | 0.1572   | 0.2038   | 0.1674   | 0.5211  |
| LAC    | 0.1552   | 0.1283   | 0.1722   | 0.0009  | 0.0189   | 0.0159   | 0.0193   | 0.0091  | 0.0245   | 0.0233   | 0.0235   | 0.0057  |
| TT2    | 0.0625   | 0.0163   | 0.0283   | 0.0000  | 0.0076   | 0.0020   | 0.0032   | 0.0000  | 0.0099   | 0.0030   | 0.0039   | 0.0000  |
| TT8    | 0.0129   | 0.0143   | 0.0103   | 0.0007  | 0.0016   | 0.0018   | 0.0012   | 0.0071  | 0.0020   | 0.0026   | 0.0014   | 0.0045  |
| TTG1   | 0.2069   | 0.1548   | 0.2211   | 0.0061  | 0.0252   | 0.0191   | 0.0248   | 0.0594  | 0.0327   | 0.0282   | 0.0301   | 0.0375  |
| MYB    | 0.1013   | 0.0876   | 0.0540   | 0.0001  | 0.0123   | 0.0108   | 0.0060   | 0.0012  | 0.0160   | 0.0159   | 0.0074   | 0.0007  |

Note: three internal genes of GADPH, CYP, and EF1a were selected to do the comparison of relative expression of genes involved in PA biosynthesis pathway, in three groups of sainfoin with high (H-Sainfoin), medium (M-Sainfoin), and low (L-Sainfoin) PA contents, and alfalfa cultivar "Zhongmu No.1". RNA-seq data for alfalfa leaves was downloaded from NCBI, with accession number of PRJNA795295.

**Supplementary Table 28 Primers for gene expressions in PA biosynthesis pathway by using qRT-PCR**

| <b>Name</b> | <b>Primer sequences</b> | <b>Note</b>                                 |
|-------------|-------------------------|---------------------------------------------|
| OvGADPH-F   | CACAACCAACTGCCTTGCTC    | Internal gene GADPH in <i>O. viciifolia</i> |
| OvGADPH-R   | CTGGGTGGCAGTGATGGAAT    | Internal gene GADPH in <i>O. viciifolia</i> |
| MsGADPH-F   | CATTCCTGTCCCAACTGTG     | Internal gene GADPH in <i>M. sativa</i>     |
| MsGADPH-R   | TTCAAGTTGCCCTCGGACTC    | Internal gene GADPH in <i>M. sativa</i>     |
| OvEF1a-F    | AAGCGTGGTTTCGTTGCATC    | Internal gene EF1a in <i>O. viciifolia</i>  |
| OvEF1a-R    | TGTGGGATGTGTGGCAATCA    | Internal gene EF1a in <i>O. viciifolia</i>  |
| MsEF1a-F    | AAGCGTGGTTTCGTTGCATC    | Internal gene EF1a in <i>M. sativa</i>      |
| MsEF1a-R    | GTGAGAGGTGTGGCAATCGA    | Internal gene EF1a in <i>M. sativa</i>      |
| OvPAL-F     | GCTGTTGGTTCTGGTTTGGC    | Gene PAL in <i>O. viciifolia</i>            |
| OvPAL-R     | ACCTTGCATCACTTCAGCGA    | Gene PAL in <i>O. viciifolia</i>            |
| MsPAL-F     | CGGGTGAGGAGTGTGACAAA    | Gene PAL in <i>M. sativa</i>                |
| MsPAL-R     | CCGTTCCACTCTCCCAAACA    | Gene PAL in <i>M. sativa</i>                |
| OvANR-F     | CGCGCACATATATTCCTGGC    | Gene ANR in <i>O. viciifolia</i>            |
| OvANR-R     | ACTGAGGGTATCGCTTGCTG    | Gene ANR in <i>O. viciifolia</i>            |
| MsANR-F     | TGTGGCAGAGAAAGAATCAGCT  | Gene ANR in <i>M. sativa</i>                |
| MsANR-R     | ACTGAGGGTATCGTTTGCTGA   | Gene ANR in <i>M. sativa</i>                |
| OvF3H-F     | GCCAATTGAGGGTGCTTTCG    | Gene F3H in <i>O. viciifolia</i>            |
| OvF3H-R     | CTGGGTTCTGGAATGTGGCT    | Gene F3H in <i>O. viciifolia</i>            |
| OvF35H-F    | ACAACGACGCCTCCAAGAAT    | Gene F3'5'H in <i>O. viciifolia</i>         |
| OvF35H-R    | CGAGGCAAGTTTAGTGGGGT    | Gene F3'5'H in <i>O. viciifolia</i>         |
| OvANS-F     | GGAGTTGAAGCCACACAGA     | Gene ANS in <i>O. viciifolia</i>            |
| OvANS-R     | CCGGGGACACATTTAGCAGT    | Gene ANS in <i>O. viciifolia</i>            |
| MsF3H-F     | CAGGGAGAAGCTGTGAAGGA    | Gene F3H in <i>M. sativa</i>                |
| MsF3H-R     | ATCCTTCTGGCTTGCTGGC     | Gene F3H in <i>M. sativa</i>                |
| MsF35H-F    | GGGCTTCGTATGGTCCAAC     | Gene F3'5'H in <i>M. sativa</i>             |
| MsF35H-R    | ACTGATAATGGCACGGCTCG    | Gene F3'5'H in <i>M. sativa</i>             |
| MsANS-F     | GCTGGTGGAAATGGAAGAGCT   | Gene ANS in <i>M. sativa</i>                |
| MsANS-R     | GGGCTTCAACTCCAAGTGCT    | Gene ANS in <i>M. sativa</i>                |
