# Supplementary material for: A chromosome-level genome assembly for Onobrychis viciifolia reveals gene copy number gain underlying enhanced proanthocyanidin biosynthesis
Source: Springer Nature journal article supplement (doi:10.1038/s42003-023-05754-6), 2024-01-05
Supplement: 42003_2023_5754_MOESM2_ESM.pdf [file 42003_2023_5754_MOESM2_ESM.pdf]

## Description of Additional Supplementary Files

**File name:** Supplementary Data 1

**Description:** The source data of fig. 1d that GC content vs. chromosome number of Fabaceae and non-Fabaceae species.

**File name:** Supplementary Data 2

**Description:** The source data of fig. 2c that LTR insertion time and density in six Fabales plants.

**File name:** Supplementary Data 3

**Description:** The source data of fig. 3a that Distribution of synonymous substitution rates ( $K_s$ ) of homologous gene pairs between *O. viciifolia* and other species.

**File name:** Supplementary Data 4

**Description:** The source data of fig. 3b that Syntenic depths between *O. viciifolia* and *C. arietinum*.
